# Supplementary material for: Genetic mapping and functional analysis of a classical tassel branch number mutant Tp2 in maize
Source: Front Plant Sci. 2023 Jun 2;14:1183697. doi: 10.3389/fpls.2023.1183697 (PMC10275490; doi:10.3389/fpls.2023.1183697)
Supplement: Supplementary file 1 [file Table_1.xlsx]

## Sheet: Table S1
Table S1. RNA-seq library sequencing and mapping statistics.
Sample	Clean data Fastq file name	Total # of reads	Total # of reads after trimming	Total mapped reads	Mapping rate
TW1	TW1_R1.fq.gz	55723968	54403289	45030717	0.82772
	TW1_R2.fq.gz	55723968	54403289	44899709	0.825312
TW2	TW2_R1.fq.gz	59442528	58085447	48266535	0.830957
	TW2_R2.fq.gz	59442528	58085447	48148023	0.828917
TM1	TM1_R1.fq.gz	46644593	45202663	37534140	0.830352
	TM1_R2.fq.gz	46644593	45202663	37515321	0.829936
TM2	TM2_R1.fq.gz	53055664	51591002	42083105	0.815706
	TM2_R2.fq.gz	53055664	51591002	41797983	0.81018
TW means the RNA from tassel of homozygous wild-type.
TM means the RNA from tassel of homozygous mutant.

## Sheet: Table S2
Table S2. miRNA-seq library sequencing and reads statistics.
Sample	Clean data Fastq file name	Total # of reads	Total # of reads after trimming
Wild-type	miRNA-mu-clean.fq	24684150	22863900
Mutant	miRNA-mu-clean.fq	24649474	22893532

## Sheet: Table S3
Table S3. The primers for qRT-PCR.
Name	Sequence (5'-3')
miR156h-stem	GTCGTATCCAGTGCAGGGTCCGAGGTATTCGCACTGGATACGACGTGCTC
qPCR-miR156h-specific	CGCGCGTGACAGAAGAGAGT
qPCR-Zm-25786-F	CTGAAGCGAGACGGTGTTAGC
qPCR-Zm-25786-R	TGTCGCTCAATGGTCCTGG
Ubi-F	CTGCCGATGTGCCTGCGTCG
Ubi-R	GTCATAGTTCTGGGTAGTACGC

## Sheet: Table S4
Table S4. The primers for constructing of overexpression vector.
Name	Sequence (5'-3')
miR156h-OE-F	ACTCTAGAGGATCCAACAGCCCCCGGGCTCGCGCGCGCGC
miR156h-OE-R	TCGTGATCTTTGTAATCCATCCCGAGGCCCGGACCAGCGGAT

## Sheet: Table S5
Table S5. Genetic analyses of F2 populations of Tp2.
Population	Number of plants		c2 (3:1)
	Mutant	Wild-type
1	69	20	0.58
2	70	18	0.32

## Sheet: Table S6
Table S6. Summary of primer information for mapping of Tp2.
SNP ID	Location	SNP	Sequence (5'-3')
P1-F	Chr10: 119057356	G/C	GATACTCGGGGGTTCTGACTT
P1-R			ATAGCGACGCGTTTCAACGGTGAGGGTTCTTGGGCTT
P2-F	Chr10: 124037594	C/T	CCACTTCGCTCTCTCCACAT
P2-R			ATAGCGACGCGTTTCAACAAGACAGCGACTGAGCCG
P3-F	Chr10: 126886439	A/G	ACTTCGGGGTTGGGTGACT
P3-R			ATAGCGACGCGTTTCAACGTGTGGGTCCTCTTCCTCAT
P4-F	Chr10: 128984928	A/T	CAACATTCACAAAGAGAAAATAAAC
P4-R			ATAGCGACGCGTTTCAACCAGTTTGGCGGTGGGAAG
P5-F	Chr10: 129239549	C/A	CAAAAAGTGTAGTCGCAGGAA
P5-R			ATAGCGACGCGTTTCAACCCAAAGATGCGAGGAACAG
P6-F	Chr10: 132012278	G/A	GACTCGGTCATCATAGTGCTG
P6-R			ATAGCGACGCGTTTCAACGGCAAGACAATAAGCAGAAG
P7-F	Chr10: 133096777	A/C	CGATGATGAAGAAAAACAGCA
P7-R			ATAGCGACGCGTTTCAACTACCCTCCGTAGGCAACTGAT
P8-F	Chr10: 129425377	G/A	CAGAGCGGTGAGAATGAAAGA
P8-R			AATCACCAGCATTTCCCACA
P9-F	Chr10: 129534025	A/C	ATGTTTTAGCATTTGATGTAGGGGT
P9-R			CATTATCAAACTACAGGTTAGCAAGG
P10-F	Chr10: 129673211	G/A	CTGAACTTGATTGCTTTTGGT
P10-R			TGAACTGAAGAAATCTGACATACA
P11-F	Chr10: 130400408	G/C	AATAGCAAAAAGACCTTCAGC
P11-R			ATAGCGACGCGTTTCAACGTCCCTGGCAAGAGCGTT
P12-F	Chr10: 131395766	G/A	TCTCCGAGTTGACAATCCAC
P12-R			ATAGCGACGCGTTTCAACTGTCTGTAAGGTTTCTGCTGC

## Sheet: Table S7
Table S7. The differentially expressed genes obtained by mRNA-Seq data analysis.
Gene_ID	Value_1	Value_2	log2(fold_change)	FDR	Status	gene_description
Zm00001d000126	14.3052	45.9937	1.68489	0.00015	up-regulated	OSJNBb0118P14.9 protein
Zm00001d002119	10.6003	27.3141	1.36554	0.0005	up-regulated	ABC transporter B family member 19
Zm00001d002796	0.488006	4.95874	3.345	0.00015	up-regulated	ELMO/CED-12 family protein
Zm00001d002814	13.1081	45.7501	1.80331	5e-05	up-regulated	Polyprotein
Zm00001d002937	0.202475	5.54762	4.77605	5e-05	up-regulated	cytochrome P450 family 72 subfamily A polypeptide 8
Zm00001d003438	9.17402	33.8395	1.88308	0.0001	up-regulated	loricrin-related
Zm00001d003861	3.61487	16.4192	2.18337	0.00035	up-regulated	Potassium high-affinity transporter
Zm00001d006033	0.0474598	4.5503	6.58311	5e-05	up-regulated	Inactive LRR receptor-like serine/threonine-protein kinase BIR2
Zm00001d006110	5.17731	46.8836	3.17881	5e-05	up-regulated	Transcription factor bHLH137
Zm00001d006861	2.88747	12.4415	2.10728	0.00045	up-regulated	#N/A
Zm00001d009180	0.653317	26.8851	5.36288	5e-05	up-regulated	Folate-biopterin transporter 1 chloroplastic
Zm00001d010233	1.11234	8.39664	2.91622	0.0002	up-regulated	Zea mays MADS18
Zm00001d011183	19.6285	70.5618	1.84594	0.00045	up-regulated	thiamine biosynthesis1
Zm00001d012485	7.4392	41.2127	2.46987	5e-05	up-regulated	Transmembrane amino acid transporter family protein
Zm00001d014261	0.691459	9.44033	3.77112	5e-05	up-regulated	#N/A
Zm00001d016155	2.80604	19.231	2.77683	5e-05	up-regulated	Putative callose synthase 8
Zm00001d016691	7.24279	174.557	4.59101	5e-05	up-regulated	Copper transport protein CCH
Zm00001d017614	0.452037	13.3255	4.8816	0.0001	up-regulated	Agamous-like MADS-box protein AGL6
Zm00001d018206	8.65339	26.8509	1.63363	0.0005	up-regulated	Nitrate reductase [NADH] 2
Zm00001d019335	4.8895	22.2607	2.18674	5e-05	up-regulated	ARM repeat superfamily protein
Zm00001d021413	1.19269	33.2498	4.80105	0.00015	up-regulated	Protein PIN-LIKES 7
Zm00001d023724	11.0128	37.393	1.76359	5e-05	up-regulated	#N/A
Zm00001d024505	0.177411	4.30556	4.60104	0.00015	up-regulated	#N/A
Zm00001d025509	13.9105	188.592	3.76103	5e-05	up-regulated	RmlC-like cupins superfamily protein
Zm00001d025944	14.3656	65.0119	2.17808	5e-05	up-regulated	Yabby14 isoform 1%3B Yabby14 isoform 2
Zm00001d026528	10.5009	97.9172	3.22106	5e-05	up-regulated	Oligouridylate-binding protein 1C
Zm00001d027788	3.44675	27.4185	2.99184	5e-05	up-regulated	#N/A
Zm00001d027868	20.4042	58.4374	1.51803	0.0003	up-regulated	E3 ubiquitin ligase BIG BROTHER
Zm00001d027996	27.1256	100.848	1.89445	5e-05	up-regulated	Alcohol dehydrogenase-like 2
Zm00001d028119	0.0767702	5.09127	6.05134	5e-05	up-regulated	#N/A
Zm00001d028217	3.88837	107.297	4.7863	5e-05	up-regulated	Zea mays MADS14
Zm00001d028965	1.02486	4.37363	2.0934	5e-05	up-regulated	MADS box interactor-like
Zm00001d029237	5.18299	36.6895	2.82351	5e-05	up-regulated	Probable low-specificity L-threonine aldolase 1
Zm00001d029594	74.1222	230.121	1.63441	0.00015	up-regulated	allene oxide cyclase1
Zm00001d031300	1.1621	11.484	3.30482	0.0001	up-regulated	Probable galactinol--sucrose galactosyltransferase 1
Zm00001d032042	30.4021	88.3993	1.53987	0.00045	up-regulated	Cytochrome P450 CYP78A53
Zm00001d032733	0.538394	7.36053	3.77307	0.0004	up-regulated	#N/A
Zm00001d033307	0.104749	4.68628	5.48344	0.0005	up-regulated	Outer arm dynein light chain 1 protein
Zm00001d033383	9.09218	25.0538	1.46233	0.00035	up-regulated	hydroxymethylpyrimidine phosphate synthase1
Zm00001d034673	13.8971	42.2324	1.60357	0.00025	up-regulated	Bowman-Birk type trypsin inhibitor
Zm00001d035713	8.8453	35.5651	2.00748	5e-05	up-regulated	WAT1-related protein
Zm00001d036425	5.44968	37.2473	2.77289	5e-05	up-regulated	Silky1
Zm00001d037651	3.63772	18.6681	2.35947	0.00015	up-regulated	Subtilisin-like serine endopeptidase family protein
Zm00001d038720	0.237447	8.5944	5.17772	5e-05	up-regulated	#N/A
Zm00001d039301	112.457	479.232	2.09135	5e-05	up-regulated	Vegetative storage protein PNI288
Zm00001d039908	461.455	1255.53	1.44404	0.00015	up-regulated	Ribosomal protein L26
Zm00001d043235	42.0187	128.171	1.60896	0.0001	up-regulated	Methylesterase 3
Zm00001d046476	0.466124	6.58524	3.82045	5e-05	up-regulated	CAI-1 autoinducer sensor kinase/phosphatase cqsS isoform 1
Zm00001d048082	2.02134	37.1923	4.20162	0.0001	up-regulated	Zea mays MADS8
Zm00001d048089	0.00248971	4.91947	10.9483	5e-05	up-regulated	ARM repeat superfamily protein
Zm00001d048709	93.8994	434.954	2.21168	5e-05	up-regulated	benzoxazinless1
Zm00001d048731	0.130999	7.51119	5.84142	5e-05	up-regulated	P-loop containing nucleoside triphosphate hydrolases superfamily protein
Zm00001d048784	0.407398	24.3954	5.90403	5e-05	up-regulated	E3 ubiquitin-protein ligase RGLG1
Zm00001d049179	94.6038	346.741	1.87389	5e-05	up-regulated	O-methyltransferase ZRP4
Zm00001d051960	0.25045	5.20809	4.37816	0.00015	up-regulated	#N/A
Zm00001d053684	8.30566	56.8886	2.77597	5e-05	up-regulated	Putative citrate synthase family protein
Zm00001d053727	2.48547	12.295	2.30648	0.00015	up-regulated	Pyrophosphate-energized vacuolar membrane proton pump 1
Zm00001d054044	5.11878	23.8709	2.22138	0.0001	up-regulated	Catalase isozyme 3
Zm00001d002678	27.8312	0.827262	-5.07221	5e-05	down-regulated	Prolyl oligopeptidase family protein
Zm00001d003068	49.7859	10.9616	-2.18328	0.00015	down-regulated	Phosphoenolpyruvate carboxylase kinase 2
Zm00001d006010	91.9642	34.2982	-1.42294	0.0003	down-regulated	#N/A
Zm00001d006028	66.4969	20.6307	-1.6885	0.00015	down-regulated	Squamosa promoter-binding-like protein 15
Zm00001d006451	174.137	31.0296	-2.4885	5e-05	down-regulated	Squamosa promoter-binding-like protein 5
Zm00001d008245	186.845	48.0455	-1.95936	0.0004	down-regulated	rpl30
Zm00001d009702	54.1667	16.2051	-1.74096	5e-05	down-regulated	P-loop containing nucleoside triphosphate hydrolases superfamily protein
Zm00001d012081	5277.21	2056.13	-1.35984	0.00035	down-regulated	PVR3-like protein%3B Protease inhibitor/seed storage/LTP family protein
Zm00001d013258	13.1692	1.67339	-2.97632	5e-05	down-regulated	Zea mays MADS31
Zm00001d015233	34.77	7.22973	-2.26583	5e-05	down-regulated	Squamosa promoter-binding-like protein 2
Zm00001d017597	156.145	29.9282	-2.38331	5e-05	down-regulated	SPX domain-containing membrane protein
Zm00001d019565	74.408	20.7434	-1.84281	5e-05	down-regulated	Aquaporin PIP2-6
Zm00001d020941	256.331	58.269	-2.13721	5e-05	down-regulated	tassel sheath4
Zm00001d021450	82.1728	13.1366	-2.64506	5e-05	down-regulated	Cytokinin riboside 5'-monophosphate phosphoribohydrolase LOG5
Zm00001d021573	400.468	93.7355	-2.09502	5e-05	down-regulated	SBP domain containing protein
Zm00001d022193	108.529	18.3371	-2.56524	5e-05	down-regulated	ramosa3
Zm00001d023984	12.2749	1.5291	-3.00495	0.0002	down-regulated	GDSL esterase/lipase
Zm00001d024973	6.07731	1.0305	-2.56008	0.0004	down-regulated	#N/A
Zm00001d024975	6.76608	1.04828	-2.6903	0.00035	down-regulated	Disease resistance protein RPM1
Zm00001d024978	9.93586	2.06064	-2.26955	0.0001	down-regulated	Disease resistance protein RPM1
Zm00001d025103	55.5608	12.812	-2.11657	5e-05	down-regulated	amine oxidase1
Zm00001d027330	61.4719	0.893012	-6.1051	0.0002	down-regulated	Remorin
Zm00001d028311	35.5467	6.32148	-2.49138	0.0001	down-regulated	Antiporter/ drug transporter/ transporter
Zm00001d028368	32.5915	9.72049	-1.74539	5e-05	down-regulated	Purple acid phosphatase 1
Zm00001d028510	277.34	99.3583	-1.48094	0.0001	down-regulated	Protein FAF-like chloroplastic
Zm00001d028867	198.263	34.1758	-2.53637	5e-05	down-regulated	cAMP-regulated phosphoprotein 19-related protein
Zm00001d031451	65.3998	22.595	-1.53329	0.00015	down-regulated	SBP-domain protein 5
Zm00001d031749	32.9632	9.74832	-1.75763	0.00015	down-regulated	Pyridoxal phosphate (PLP)-dependent transferases superfamily protein
Zm00001d032375	7.35941	1.20611	-2.60923	0.00045	down-regulated	#N/A
Zm00001d032376	12.4768	2.30384	-2.43714	0.0001	down-regulated	#N/A
Zm00001d033024	9.07972	1.10501	-3.03859	0.0002	down-regulated	Tyrosine decarboxylase 1
Zm00001d034898	103.733	26.4368	-1.97226	5e-05	down-regulated	gibberellin 20-oxidase1
Zm00001d036530	0.0477798	0.61443	3.68477	5e-05	down-regulated	#N/A
Zm00001d036965	77.3554	19.6565	-1.9765	0.00035	down-regulated	Zinc transporter 4
Zm00001d039697	5.19563	0.167665	-4.95364	0.00035	down-regulated	Cytochrome P450 monooxygenase
Zm00001d041204	5.95463	0.191735	-4.95683	0.0002	down-regulated	lipoxygenase12
Zm00001d041663	53.9335	8.03924	-2.74605	5e-05	down-regulated	Jasmonate-induced protein
Zm00001d041726	25.2685	2.50531	-3.33428	0.0004	down-regulated	Protein DOWNY MILDEW RESISTANCE 6
Zm00001d042540	126.483	37.9535	-1.73664	0.00045	down-regulated	Linoleate 9S-lipoxygenase 1
Zm00001d044564	0.0483563	1.57375	5.02436	0.00015	down-regulated	ABC transporter B family member 9
Zm00001d045563	42.8742	9.10329	-2.23565	0.0001	down-regulated	dwarf plant3
Zm00001d047893	31.1853	8.20158	-1.92689	5e-05	down-regulated	phosphoenolpyruvate carboxykinase homolog2
Zm00001d052890	170.143	15.5708	-3.44983	5e-05	down-regulated	Squamosa promoter-binding-like protein 15

## Sheet: Table S8
Table S8. The potential target genes of zma-miR156h.
Target gene IDs
Zm00001d002462
Zm00001d003166
Zm00001d005584
Zm00001d006028
Zm00001d006091
Zm00001d006132
Zm00001d006451
Zm00001d007065
Zm00001d009735
Zm00001d012015
Zm00001d013075
Zm00001d013757
Zm00001d014109
Zm00001d014698
Zm00001d015233
Zm00001d015327
Zm00001d015410
Zm00001d016198
Zm00001d020728
Zm00001d020941
Zm00001d021056
Zm00001d021573
Zm00001d022275
Zm00001d024212
Zm00001d024338
Zm00001d025795
Zm00001d026175
Zm00001d028208
Zm00001d028611
Zm00001d031451
Zm00001d031547
Zm00001d031863
Zm00001d031961
Zm00001d032575
Zm00001d035254
Zm00001d036165
Zm00001d036422
Zm00001d036507
Zm00001d039900
Zm00001d041105
Zm00001d041923
Zm00001d042319
Zm00001d042670
Zm00001d043320
Zm00001d044274
Zm00001d044281
Zm00001d044593
Zm00001d045195
Zm00001d046942
Zm00001d047540
Zm00001d048007
Zm00001d049165
Zm00001d049822
Zm00001d049824
Zm00001d050928
Zm00001d052071
Zm00001d052890
Zm00001d052906
Zm00001d053663
Zm00001d053775
Zm00001d053890

## Sheet: Table S9
Table S9. The overlapped genes of potential target genes and down-regulated genes.
Gene ID	Gene	Annotation	Status
Zm00001d020941	tassel sheath4	SBP-box transcription factor 6	down-regulated
Zm00001d031451	unbranched2	SBP-box transcription factor 8	down-regulated
Zm00001d052890	unbranched3	SBP-box transcription factor 7	down-regulated
Zm00001d006451	ZmSBP13	SBP-box transcription factor 13	down-regulated
Zm00001d006028	ZmSBP23	SBP-box transcription factor 23	down-regulated
Zm00001d015233	ZmSBP27	SBP-box transcription factor 27	down-regulated
Zm00001d021573	ZmSBP29	SBP-box transcription factor 29	down-regulated

## Sheet: Table S10
Table S10. The overlapped potential target genes of ZmSBP13.
Zm00001d047879
Zm00001d016899
Zm00001d032873
Zm00001d006673
Zm00001d051863
Zm00001d023669
Zm00001d045459
Zm00001d039104
Zm00001d028118
Zm00001d015139
Zm00001d052061
Zm00001d039012
Zm00001d038135
Zm00001d048672
Zm00001d039460
Zm00001d013032
Zm00001d002071
Zm00001d013113
Zm00001d045460
Zm00001d043043
Zm00001d052653
Zm00001d003505
Zm00001d031316
Zm00001d026553
Zm00001d053818
Zm00001d020696
Zm00001d001827
Zm00001d003112
Zm00001d018393
Zm00001d042056
Zm00001d023455
Zm00001d032686
Zm00001d021160
Zm00001d018343
Zm00001d013834
Zm00001d032197
Zm00001d006711
Zm00001d037715
Zm00001d012446
Zm00001d039011
Zm00001d012146
Zm00001d021247
Zm00001d017917
Zm00001d001964
Zm00001d018428
Zm00001d018105
Zm00001d039492
Zm00001d021208
Zm00001d017869
Zm00001d039648
Zm00001d017773
Zm00001d021400
Zm00001d018178
Zm00001d028453
Zm00001d037318
Zm00001d024675
Zm00001d005975
Zm00001d007865
Zm00001d001999
Zm00001d034638
Zm00001d042376
Zm00001d027597
Zm00001d049361
Zm00001d039472
Zm00001d029366
Zm00001d017952
Zm00001d021971
Zm00001d043238
Zm00001d027900
Zm00001d002614
Zm00001d032438
Zm00001d026202
Zm00001d025449
Zm00001d044405
Zm00001d002115
Zm00001d028930
Zm00001d048411
Zm00001d015012
Zm00001d002251
Zm00001d025413
Zm00001d038854
Zm00001d017713
Zm00001d047801
Zm00001d003089
Zm00001d021119
Zm00001d036839
Zm00001d018439
Zm00001d002847
Zm00001d027948
Zm00001d002141
Zm00001d022107
Zm00001d026447
Zm00001d029330
Zm00001d047917
Zm00001d017699
Zm00001d039499
Zm00001d013672
Zm00001d051898
Zm00001d002959
Zm00001d052229
Zm00001d018037
Zm00001d052930
Zm00001d047260
Zm00001d014755
Zm00001d044430
Zm00001d049592
Zm00001d039520
Zm00001d038776
Zm00001d021170
Zm00001d012956
Zm00001d042887
Zm00001d043267
Zm00001d012607
Zm00001d053757
Zm00001d013794
Zm00001d052444
Zm00001d011620
Zm00001d047349
Zm00001d028999
Zm00001d012337
Zm00001d005931
Zm00001d001858
Zm00001d048310
Zm00001d036738
Zm00001d013375
Zm00001d022234
Zm00001d001945
Zm00001d006627
Zm00001d028326
Zm00001d028987
Zm00001d042717
Zm00001d033876
Zm00001d029342
Zm00001d028074
Zm00001d028793
Zm00001d023803
Zm00001d038509
Zm00001d003840
Zm00001d018930
Zm00001d017859
Zm00001d021519
Zm00001d043610
Zm00001d034495
Zm00001d028303
Zm00001d042443
Zm00001d038587
Zm00001d031454
Zm00001d011750
Zm00001d031732
Zm00001d049510
Zm00001d039483
Zm00001d011020
Zm00001d013107
Zm00001d033623
Zm00001d044291
Zm00001d049061
Zm00001d026584
Zm00001d006883
Zm00001d029142
Zm00001d018472
Zm00001d038216
Zm00001d038250
Zm00001d038191
Zm00001d027924
Zm00001d034663
Zm00001d010798
Zm00001d047533
Zm00001d043674
Zm00001d049073
Zm00001d028622
Zm00001d039535
Zm00001d027334
Zm00001d048344
Zm00001d028574
Zm00001d027506
Zm00001d026126
Zm00001d002090
Zm00001d038050
Zm00001d019358
Zm00001d006236
Zm00001d026590
Zm00001d021947
Zm00001d015468
Zm00001d012514
Zm00001d042664
Zm00001d001774
Zm00001d040733
Zm00001d010171
Zm00001d013119
Zm00001d020403
Zm00001d030888
Zm00001d002277
Zm00001d002163
Zm00001d002431
Zm00001d037632
Zm00001d017380
Zm00001d047822
Zm00001d008756
Zm00001d021985
Zm00001d005965
Zm00001d047522
Zm00001d048203
Zm00001d044026
Zm00001d014654
Zm00001d002568
Zm00001d044030
Zm00001d009555
Zm00001d008793
Zm00001d016225
Zm00001d025437
Zm00001d047581
Zm00001d044171
Zm00001d027437
Zm00001d028671
Zm00001d011752
Zm00001d048301
Zm00001d002261
Zm00001d003009
Zm00001d039991
Zm00001d023282
Zm00001d039065
Zm00001d013210
Zm00001d003850
Zm00001d022163
Zm00001d034038
Zm00001d037218
Zm00001d011940
Zm00001d033317
Zm00001d009570
Zm00001d048020
Zm00001d013627
Zm00001d021825
Zm00001d020925
Zm00001d027667
Zm00001d013176
Zm00001d020804
Zm00001d002158
Zm00001d012362
Zm00001d002965
Zm00001d017379
Zm00001d038880
Zm00001d006256
Zm00001d021835
Zm00001d013003
Zm00001d048214
Zm00001d005783
Zm00001d010272
Zm00001d021959
Zm00001d038873
Zm00001d005751
Zm00001d017987
Zm00001d030915
Zm00001d042853
Zm00001d018179
Zm00001d016410
Zm00001d005699
Zm00001d022151
Zm00001d042535
Zm00001d032142
Zm00001d052014
Zm00001d046655
Zm00001d017275
Zm00001d031257
Zm00001d043728
Zm00001d003334
Zm00001d018112
Zm00001d048689
Zm00001d042066
Zm00001d018727
Zm00001d027361
Zm00001d012689
Zm00001d022209
Zm00001d052118
Zm00001d029783
Zm00001d012641
Zm00001d011952
Zm00001d038846
Zm00001d003190
Zm00001d029164
Zm00001d033634
Zm00001d013307
Zm00001d033636
Zm00001d012693
Zm00001d007079
Zm00001d035443
Zm00001d038625
Zm00001d052261
Zm00001d013220
Zm00001d012520
Zm00001d002099
Zm00001d022084
Zm00001d012972
Zm00001d028298
Zm00001d031487
Zm00001d032555
Zm00001d043069
Zm00001d013869
Zm00001d044099
Zm00001d038165
Zm00001d028286
Zm00001d014328
Zm00001d039825
Zm00001d039339
Zm00001d017837
Zm00001d047882
Zm00001d010662
Zm00001d013206
Zm00001d048293
Zm00001d043392
Zm00001d042918
Zm00001d047937
Zm00001d032186
Zm00001d021236
Zm00001d043278
Zm00001d012832
Zm00001d043544
Zm00001d008922
Zm00001d013033
Zm00001d043970
Zm00001d017284
Zm00001d016664
Zm00001d013896
Zm00001d022233
Zm00001d034109
Zm00001d036535
Zm00001d021401
Zm00001d032554
Zm00001d005391
Zm00001d012227
Zm00001d038810
Zm00001d047776
Zm00001d025963
Zm00001d033714
Zm00001d006776
Zm00001d039365
Zm00001d042146
Zm00001d013047
Zm00001d043479
Zm00001d003432
Zm00001d027446
Zm00001d011395
Zm00001d013638
Zm00001d005995
Zm00001d027901
Zm00001d036402
Zm00001d033859
Zm00001d013306
Zm00001d009556
Zm00001d007274
Zm00001d031542
Zm00001d005664
Zm00001d036768
Zm00001d002433
Zm00001d035475
Zm00001d043087
Zm00001d033624
Zm00001d022549
Zm00001d016409
Zm00001d031833
Zm00001d038750
Zm00001d017770
Zm00001d043059
Zm00001d022102
Zm00001d044100
Zm00001d015515
Zm00001d037329
Zm00001d025753
Zm00001d008399
Zm00001d003504
Zm00001d042116
Zm00001d022469
Zm00001d032687
Zm00001d034527
Zm00001d048736
Zm00001d043366
Zm00001d018392
Zm00001d012513
Zm00001d032836
Zm00001d018380
Zm00001d018409
Zm00001d021951
Zm00001d032198
Zm00001d020926
Zm00001d031258
Zm00001d022083
Zm00001d023456
Zm00001d038551
Zm00001d025842
Zm00001d038691
Zm00001d051754
Zm00001d048014
Zm00001d010445
Zm00001d035512
Zm00001d016557
Zm00001d048469
Zm00001d021779
Zm00001d043220
Zm00001d012659
Zm00001d039532
Zm00001d013013
Zm00001d015327
Zm00001d021006
Zm00001d001924
Zm00001d002806
Zm00001d034496
Zm00001d006608
Zm00001d024772
Zm00001d038346
Zm00001d048314
Zm00001d053120
Zm00001d017613
Zm00001d026448
Zm00001d028572
Zm00001d027742
Zm00001d039647
Zm00001d045323
Zm00001d026632
Zm00001d032869
Zm00001d006628
Zm00001d012690
Zm00001d011920
Zm00001d023469
Zm00001d005698
Zm00001d015091
Zm00001d025920
Zm00001d048008
Zm00001d047045
Zm00001d038469
Zm00001d039188
Zm00001d022416
Zm00001d021223
Zm00001d011753
Zm00001d011751
Zm00001d008581
Zm00001d043052
Zm00001d054067
Zm00001d004413
Zm00001d027335
Zm00001d042941
Zm00001d026540
Zm00001d038991
Zm00001d046813
Zm00001d038855
Zm00001d007793
Zm00001d017836
Zm00001d044994
Zm00001d022381
Zm00001d024755
Zm00001d051800
Zm00001d007076
Zm00001d034371
Zm00001d053839
Zm00001d042325
Zm00001d012471
Zm00001d008846
Zm00001d022451
Zm00001d026446
Zm00001d042367
Zm00001d032472
Zm00001d052443
Zm00001d002548
Zm00001d038451
Zm00001d007784
Zm00001d039039
Zm00001d026012
Zm00001d017604
Zm00001d022005
Zm00001d016616
Zm00001d042768
Zm00001d023220
Zm00001d022106
Zm00001d012634
Zm00001d034829
Zm00001d034444
Zm00001d008540
Zm00001d012957
Zm00001d025414
Zm00001d044435
Zm00001d042886
Zm00001d017851
Zm00001d005926
Zm00001d028565
Zm00001d002418
Zm00001d034197
Zm00001d046533
Zm00001d016972
Zm00001d027596
Zm00001d021487
Zm00001d031777
Zm00001d008704
Zm00001d025436
Zm00001d038585
Zm00001d028680
Zm00001d006297
Zm00001d022240
Zm00001d047676
Zm00001d006534
Zm00001d002439
Zm00001d043121
Zm00001d012530
Zm00001d047931
Zm00001d003495
Zm00001d020781
Zm00001d026487
Zm00001d037573
Zm00001d010651
Zm00001d021826
Zm00001d053926
Zm00001d025947
Zm00001d038984
Zm00001d044495
Zm00001d006580
Zm00001d039140
Zm00001d017755
Zm00001d044027
Zm00001d022315
Zm00001d048013
Zm00001d025964
Zm00001d017042
Zm00001d013108
Zm00001d006884
Zm00001d018827
Zm00001d036736
Zm00001d002530
Zm00001d047493
Zm00001d029141
Zm00001d026267
Zm00001d038989
Zm00001d012528
Zm00001d021452
Zm00001d049704
Zm00001d039095
Zm00001d042449
Zm00001d047579
protein_coding
Zm00001d043587
Zm00001d038452
Zm00001d014790
Zm00001d028103
Zm00001d038852
Zm00001d027618
Zm00001d017700
Zm00001d002826
Zm00001d002535
Zm00001d043480
Zm00001d039400
Zm00001d037631
Zm00001d026460
Zm00001d027522
Zm00001d052137
Zm00001d030916
Zm00001d018349
Zm00001d039426
Zm00001d038751
Zm00001d023859
Zm00001d026321
Zm00001d021224
Zm00001d043800
Zm00001d013400
Zm00001d011965
Zm00001d003265
Zm00001d021237
Zm00001d013221
Zm00001d042627
Zm00001d017298
Zm00001d033321
Zm00001d026471
Zm00001d009508
Zm00001d020837
Zm00001d045513
Zm00001d039197
Zm00001d010726
Zm00001d038166
Zm00001d044364
Zm00001d033633
Zm00001d001766
Zm00001d036668
Zm00001d053890
Zm00001d039328
Zm00001d012831
Zm00001d044515
Zm00001d017953
Zm00001d040118
Zm00001d038065
Zm00001d028597
Zm00001d031853
Zm00001d008669
Zm00001d021180
Zm00001d002051
Zm00001d012419
Zm00001d026203
Zm00001d017960
Zm00001d002006
Zm00001d021770
Zm00001d037181
Zm00001d006029
Zm00001d048950
Zm00001d028055
Zm00001d053746
Zm00001d027353
Zm00001d018261
Zm00001d008923
Zm00001d015201
Zm00001d029969
Zm00001d021418
Zm00001d021392
Zm00001d012642
Zm00001d017274
Zm00001d006040
Zm00001d022245
Zm00001d042940
Zm00001d034369
Zm00001d043159
Zm00001d036337
Zm00001d021285
Zm00001d008984
Zm00001d026635
Zm00001d023294
Zm00001d023269
Zm00001d021389
Zm00001d018111
Zm00001d026047
Zm00001d006726
Zm00001d053858
Zm00001d013384
Zm00001d004664
Zm00001d048603
Zm00001d013625
Zm00001d001898
Zm00001d026488
Zm00001d042184
Zm00001d025915
Zm00001d002717
Zm00001d039032
Zm00001d014587
Zm00001d006578
Zm00001d037619
Zm00001d052609
Zm00001d038557
Zm00001d039378
Zm00001d022415
Zm00001d042328
Zm00001d039837
Zm00001d036529
Zm00001d048627
Zm00001d043444
Zm00001d031778
Zm00001d042288
Zm00001d051468
Zm00001d038971
Zm00001d028769
Zm00001d044988
Zm00001d007096
Zm00001d048308
Zm00001d020685
Zm00001d028722
Zm00001d017778
Zm00001d036739
Zm00001d012605
Zm00001d002353
Zm00001d026641
Zm00001d044554
Zm00001d023535
Zm00001d044167
Zm00001d008582
Zm00001d049364
Zm00001d033999
Zm00001d043853
Zm00001d035184
Zm00001d028007
Zm00001d034782
Zm00001d002811
Zm00001d042723
Zm00001d025978
Zm00001d025900
Zm00001d031676
Zm00001d043795
Zm00001d048245
Zm00001d012292
Zm00001d034655
Zm00001d043904
Zm00001d013571
Zm00001d027854
Zm00001d025903
Zm00001d012156
Zm00001d027485
Zm00001d014667
Zm00001d027741
Zm00001d027423
Zm00001d045051
Zm00001d039337
Zm00001d046811
Zm00001d018024
Zm00001d026445
Zm00001d002545
Zm00001d034277
Zm00001d021995
Zm00001d051461
Zm00001d000222
Zm00001d039156
Zm00001d040117
Zm00001d020536
Zm00001d026331
Zm00001d041475
Zm00001d028922
Zm00001d003187
Zm00001d035035
Zm00001d012550
Zm00001d002434
Zm00001d007609
Zm00001d043339
Zm00001d011132
Zm00001d038883
Zm00001d043462
Zm00001d026619
Zm00001d008548
Zm00001d038218
Zm00001d024869
Zm00001d039771
Zm00001d032310
Zm00001d029356
Zm00001d021781
Zm00001d017383
Zm00001d021762
Zm00001d031813
Zm00001d048424
Zm00001d046960
Zm00001d042837
Zm00001d018061
Zm00001d031422
Zm00001d012512
Zm00001d043782
Zm00001d049381
Zm00001d052725
Zm00001d042624
Zm00001d032605
Zm00001d018485
Zm00001d002088
Zm00001d018401
Zm00001d005392
Zm00001d022569
Zm00001d018316
Zm00001d038863
Zm00001d017966
Zm00001d048315
Zm00001d012226
Zm00001d028992
Zm00001d027877
Zm00001d052243
Zm00001d013046
Zm00001d029853
Zm00001d002065
Zm00001d002801
Zm00001d028975
Zm00001d021653
Zm00001d033898
Zm00001d028249
Zm00001d002364
Zm00001d001961
Zm00001d013097
Zm00001d038807
Zm00001d014109
Zm00001d006903
Zm00001d027988
Zm00001d010754
Zm00001d045176
Zm00001d047106
Zm00001d017764
Zm00001d018712
Zm00001d026531
Zm00001d012427
Zm00001d030110
Zm00001d018262
Zm00001d034628
Zm00001d011331
Zm00001d031470
Zm00001d047492
Zm00001d013440
Zm00001d053393
Zm00001d028102
Zm00001d033104
Zm00001d021664
Zm00001d010800
Zm00001d042051
Zm00001d026414
Zm00001d031197
Zm00001d002007
Zm00001d017551
Zm00001d002252
Zm00001d013098
Zm00001d042267
Zm00001d032471
Zm00001d021775
Zm00001d039646
Zm00001d016708
Zm00001d050195
Zm00001d053897
Zm00001d028139
Zm00001d001861
Zm00001d018103
Zm00001d005966
Zm00001d006041
Zm00001d021288
Zm00001d040399
Zm00001d006701
Zm00001d043491
Zm00001d027533
Zm00001d039196
Zm00001d047780
Zm00001d038676
Zm00001d010520
Zm00001d029506
Zm00001d001905
Zm00001d002393
Zm00001d041474
Zm00001d006677
Zm00001d022444
Zm00001d025814
Zm00001d014773
Zm00001d038148
Zm00001d034026
Zm00001d045564
Zm00001d038412
Zm00001d045431
Zm00001d017390
Zm00001d028288
Zm00001d046318
Zm00001d007978
Zm00001d034713
Zm00001d011919
Zm00001d010635
Zm00001d034779
Zm00001d042998
Zm00001d039827
Zm00001d049539
Zm00001d027649
Zm00001d033322
Zm00001d006928
Zm00001d009328
Zm00001d038652
Zm00001d047046
Zm00001d039531
Zm00001d021240
Zm00001d033632
Zm00001d044176
Zm00001d018203
Zm00001d032295
Zm00001d048201
Zm00001d034781
Zm00001d026252
Zm00001d034990
Zm00001d038297
Zm00001d033745
Zm00001d002896
Zm00001d042553
Zm00001d026541
Zm00001d011968
Zm00001d028231
Zm00001d017752
Zm00001d027626
Zm00001d006881
Zm00001d039482
Zm00001d033385
Zm00001d043796
Zm00001d043694
Zm00001d030927
Zm00001d025977
Zm00001d022246
Zm00001d002827
Zm00001d027430
Zm00001d040567
Zm00001d031794
Zm00001d047769
Zm00001d028576
Zm00001d026322
Zm00001d020967
Zm00001d026490
Zm00001d001984
Zm00001d010796
Zm00001d035156
Zm00001d042482
Zm00001d014011
Zm00001d043974
Zm00001d026072
Zm00001d021952
Zm00001d002100
Zm00001d046838
Zm00001d005663
Zm00001d021882
Zm00001d031726
Zm00001d027451
Zm00001d045537
Zm00001d022414
Zm00001d024768
Zm00001d047839
Zm00001d003157
Zm00001d038526
Zm00001d031444
Zm00001d038269
Zm00001d021960
Zm00001d017502
Zm00001d034036
Zm00001d052111
Zm00001d022390
Zm00001d047750
Zm00001d006296
Zm00001d002455
Zm00001d037973
Zm00001d037095
Zm00001d045804
Zm00001d037689
Zm00001d007038
Zm00001d014668
Zm00001d006777
Zm00001d024960
Zm00001d043122
Zm00001d039427
Zm00001d043129
Zm00001d003066
Zm00001d043934
Zm00001d029331
Zm00001d028056
Zm00001d048333
Zm00001d008791
Zm00001d029630
Zm00001d029688
Zm00001d018703
Zm00001d018000
Zm00001d004086
Zm00001d044646
Zm00001d042869
Zm00001d002825
Zm00001d004921
Zm00001d032669
Zm00001d020780
Zm00001d041290
Zm00001d002143
Zm00001d006065
Zm00001d012293
Zm00001d042724
Zm00001d018362
Zm00001d017535
Zm00001d042906
Zm00001d018148
Zm00001d013452
Zm00001d046940
Zm00001d052212
Zm00001d002815
Zm00001d031278
Zm00001d039828
Zm00001d045119
Zm00001d033459
Zm00001d028998
Zm00001d018364
Zm00001d047757
Zm00001d048690
Zm00001d034718
Zm00001d013405
Zm00001d048802
Zm00001d013070
Zm00001d039408
Zm00001d048246
Zm00001d012322
Zm00001d026439
Zm00001d027708
Zm00001d048316
Zm00001d015011
Zm00001d014205
Zm00001d043253
Zm00001d042599
Zm00001d039090
Zm00001d034602
Zm00001d052449
Zm00001d002632
Zm00001d000339
Zm00001d028287
Zm00001d025669
Zm00001d002008
Zm00001d035084
Zm00001d002546
Zm00001d017557
Zm00001d027749
Zm00001d048131
Zm00001d051615
Zm00001d038049
Zm00001d020779
Zm00001d038211
Zm00001d022202
Zm00001d001986
Zm00001d053617
Zm00001d019002
Zm00001d014756
Zm00001d006918
Zm00001d042185
Zm00001d026444
Zm00001d032402
Zm00001d012744
Zm00001d043877
Zm00001d033955
Zm00001d020137
Zm00001d010399
Zm00001d006059
Zm00001d013626
Zm00001d048066
Zm00001d039106
Zm00001d048602
Zm00001d018665
Zm00001d030837
Zm00001d039037
Zm00001d043569
Zm00001d022251
Zm00001d034750
Zm00001d052053
Zm00001d014499
Zm00001d031315
Zm00001d053211
Zm00001d012518
Zm00001d018709
Zm00001d031677
Zm00001d048340
Zm00001d027630
Zm00001d007097
Zm00001d028609
Zm00001d005888
Zm00001d008171
Zm00001d015205
Zm00001d017964
Zm00001d002641
Zm00001d026611
Zm00001d028598
Zm00001d015658
Zm00001d048334
Zm00001d025984
Zm00001d028947
Zm00001d002654
Zm00001d024676
Zm00001d002762
Zm00001d002089
Zm00001d043932
Zm00001d008974
Zm00001d034360
Zm00001d043998
Zm00001d009554
Zm00001d018229
Zm00001d010309
Zm00001d017777
Zm00001d017918
Zm00001d021207
Zm00001d002064
Zm00001d045470
Zm00001d037006
Zm00001d013202
Zm00001d038408
Zm00001d002573
Zm00001d012228
Zm00001d018713
Zm00001d034644
Zm00001d039367
Zm00001d048362
Zm00001d038860
Zm00001d032449
Zm00001d047480
Zm00001d043935
Zm00001d046563
Zm00001d038401
Zm00001d034673
Zm00001d026532
Zm00001d012238
Zm00001d017497
Zm00001d018499
Zm00001d023396
Zm00001d026222
Zm00001d026050
Zm00001d012746
Zm00001d018491
Zm00001d039764
Zm00001d025751
Zm00001d006672
Zm00001d039010
Zm00001d035646
Zm00001d051814
Zm00001d053642
Zm00001d045205
Zm00001d011133
Zm00001d010799
Zm00001d018490
Zm00001d031545
Zm00001d001899
Zm00001d018613
Zm00001d031423
Zm00001d018382
Zm00001d042114
Zm00001d020714
Zm00001d039439
Zm00001d017119
Zm00001d013112
Zm00001d010970
Zm00001d009117
Zm00001d020725
Zm00001d017965
Zm00001d012221
Zm00001d028482
Zm00001d021413
Zm00001d017682
Zm00001d025055
Zm00001d051309
Zm00001d014609
Zm00001d053566
Zm00001d043047
Zm00001d018394
Zm00001d018064
Zm00001d046182
Zm00001d002263
Zm00001d002377
Zm00001d042716
Zm00001d013402
Zm00001d053867
Zm00001d013529
Zm00001d025644
Zm00001d002025
Zm00001d012731
Zm00001d036416
Zm00001d006753
Zm00001d022380
Zm00001d027293
Zm00001d039251
Zm00001d012064
Zm00001d018754
Zm00001d018728
Zm00001d012644
Zm00001d048628
Zm00001d018421
Zm00001d003196
Zm00001d045138
Zm00001d018076
Zm00001d045657
Zm00001d018204
Zm00001d038874
Zm00001d038653
Zm00001d013570
Zm00001d008340
Zm00001d029102
Zm00001d043535
Zm00001d048138
Zm00001d027458
Zm00001d018753
Zm00001d039826
Zm00001d052017
Zm00001d010271
Zm00001d038339
Zm00001d002489
Zm00001d027680
Zm00001d033039
Zm00001d052015
Zm00001d007977
Zm00001d043954
Zm00001d039506
Zm00001d049091
Zm00001d021241
Zm00001d006212
Zm00001d043156
Zm00001d027534
Zm00001d027333
Zm00001d031471
Zm00001d038780
Zm00001d018388
Zm00001d001976
Zm00001d042868
Zm00001d027671
Zm00001d017956
Zm00001d039100
Zm00001d028679
Zm00001d043490
Zm00001d012168
Zm00001d027907
Zm00001d008891
Zm00001d018742
Zm00001d038944
Zm00001d051977
Zm00001d042115
Zm00001d021772
Zm00001d011066
Zm00001d034629
Zm00001d007765
Zm00001d026205
Zm00001d013187
Zm00001d012010
Zm00001d015092
Zm00001d027719
Zm00001d046922
Zm00001d041912
Zm00001d005763
Zm00001d038841
Zm00001d026413
Zm00001d044622
Zm00001d042313
Zm00001d036298
Zm00001d012285
Zm00001d021169
Zm00001d007489
Zm00001d052120
Zm00001d002079
Zm00001d017167
Zm00001d020738
Zm00001d002159
Zm00001d034479
Zm00001d005969
Zm00001d027520
Zm00001d014655
Zm00001d044647
Zm00001d013863
Zm00001d038170
Zm00001d003512
Zm00001d002601
Zm00001d048890
Zm00001d002080
Zm00001d037096
Zm00001d045538
Zm00001d038225
Zm00001d047105
Zm00001d027461
Zm00001d011656
Zm00001d038791
Zm00001d044004
Zm00001d025431
Zm00001d022203
Zm00001d039000
Zm00001d003492
Zm00001d048437
Zm00001d018088
Zm00001d033316
Zm00001d013387
Zm00001d052054
Zm00001d047913
Zm00001d043089
Zm00001d018477
Zm00001d032810
Zm00001d023313
Zm00001d001832
Zm00001d002415
Zm00001d039066
Zm00001d011451
Zm00001d017503
Zm00001d048202
Zm00001d042222
Zm00001d034130
Zm00001d042939
Zm00001d047758
Zm00001d026253
Zm00001d034991
Zm00001d017730
Zm00001d013244
Zm00001d029601
Zm00001d029662
Zm00001d027925
Zm00001d014722
Zm00001d037849
Zm00001d038595
Zm00001d042450
Zm00001d028806
Zm00001d020623
Zm00001d049541
Zm00001d012361
Zm00001d020454
Zm00001d018342
Zm00001d028230
Zm00001d027435
Zm00001d043855
Zm00001d014017
Zm00001d001826
Zm00001d028770
Zm00001d047970
Zm00001d052523
Zm00001d020872
Zm00001d027449
Zm00001d048601
Zm00001d038348
Zm00001d039364
Zm00001d040541
Zm00001d026489
Zm00001d035157
Zm00001d031727
Zm00001d002704
Zm00001d012195
Zm00001d053782
Zm00001d023401
Zm00001d029067
Zm00001d022017
Zm00001d028392
Zm00001d017085
Zm00001d052390
Zm00001d011208
Zm00001d007445
Zm00001d013865
Zm00001d002052
Zm00001d047025
Zm00001d027929
Zm00001d015356
Zm00001d052123
Zm00001d012336
Zm00001d017991
Zm00001d046926
Zm00001d047973
Zm00001d025762
Zm00001d053674
Zm00001d017725
Zm00001d038304
Zm00001d031475
Zm00001d053836
Zm00001d013177
Zm00001d012527
Zm00001d012968
Zm00001d040067
Zm00001d028171
Zm00001d010175
Zm00001d021931
Zm00001d027992
Zm00001d027339
Zm00001d038772
Zm00001d017118
Zm00001d018391
Zm00001d039929
Zm00001d010400
Zm00001d017849
Zm00001d036534
Zm00001d043830
Zm00001d038792
Zm00001d028744
Zm00001d018149
Zm00001d038224
Zm00001d007764
Zm00001d041471
Zm00001d032423
Zm00001d034183
Zm00001d027625
Zm00001d043389
Zm00001d001906
Zm00001d020275
Zm00001d026548
Zm00001d013192
Zm00001d027804
Zm00001d013335
Zm00001d012645
Zm00001d017821
Zm00001d003545
Zm00001d042950
Zm00001d051504
Zm00001d026642
Zm00001d053212
Zm00001d043209
Zm00001d048317
Zm00001d044327
Zm00001d042714
Zm00001d052245
Zm00001d038196
Zm00001d019227
Zm00001d012205
Zm00001d051161
Zm00001d021026
Zm00001d045311
Zm00001d002623
Zm00001d046953
Zm00001d000179
Zm00001d027480
Zm00001d013099
Zm00001d002101
Zm00001d018117
Zm00001d001824
Zm00001d044270
Zm00001d027365
Zm00001d010130
Zm00001d053993
Zm00001d022000
Zm00001d026189
Zm00001d013831
Zm00001d007075
Zm00001d038990
Zm00001d039394
Zm00001d052379
Zm00001d027623
Zm00001d047923
Zm00001d004412
Zm00001d026223
Zm00001d021893
Zm00001d047017
Zm00001d023366
Zm00001d044691
Zm00001d021714
Zm00001d013503
Zm00001d014200
Zm00001d017617
Zm00001d013208
Zm00001d023694
Zm00001d044429
Zm00001d038476
Zm00001d035440
Zm00001d010971
Zm00001d016942
Zm00001d021630
Zm00001d034027
Zm00001d034759
Zm00001d034030
Zm00001d003499
Zm00001d039910
Zm00001d043652
Zm00001d011684
Zm00001d034642
Zm00001d017751
Zm00001d048466
Zm00001d038712
Zm00001d003616
Zm00001d013809
Zm00001d017866
Zm00001d036918
Zm00001d012544
Zm00001d018001
Zm00001d018358
Zm00001d011403
Zm00001d031992
Zm00001d016922
Zm00001d047840
Zm00001d026630
Zm00001d002326
Zm00001d012321
Zm00001d007430
Zm00001d002592
Zm00001d007633
Zm00001d016920
Zm00001d051055
Zm00001d039567
Zm00001d043551
Zm00001d011735
Zm00001d010421
Zm00001d022518
Zm00001d039409
Zm00001d045387
Zm00001d042530
Zm00001d021665
Zm00001d017612
Zm00001d034145
Zm00001d014065
Zm00001d011081
Zm00001d043091
Zm00001d014290
Zm00001d013023
Zm00001d017397
Zm00001d047333
Zm00001d012700
Zm00001d047687
Zm00001d044095
Zm00001d038925
Zm00001d029602
Zm00001d025734
Zm00001d049028
Zm00001d043450
Zm00001d028949
Zm00001d052162
Zm00001d018065
Zm00001d021534
Zm00001d029663
Zm00001d039015
Zm00001d016718
Zm00001d047883
Zm00001d034427
Zm00001d035039
Zm00001d021018
Zm00001d052165
Zm00001d003195
Zm00001d011080
Zm00001d003037
Zm00001d053853
Zm00001d024568
Zm00001d012585
Zm00001d012619
Zm00001d017367
Zm00001d028693
Zm00001d038916
Zm00001d020703
Zm00001d021652
Zm00001d038717
Zm00001d000302
Zm00001d007194
Zm00001d013830
Zm00001d015299
Zm00001d038555
Zm00001d043211
Zm00001d012660
Zm00001d012881
Zm00001d034160
Zm00001d011013
Zm00001d034722
Zm00001d016655
Zm00001d043097
Zm00001d045137
Zm00001d042506
Zm00001d014608
Zm00001d051802
Zm00001d025451
Zm00001d044033
Zm00001d023468
Zm00001d040461
Zm00001d021231
Zm00001d013386
Zm00001d012452
Zm00001d052252
Zm00001d010965
Zm00001d038806
Zm00001d017622
Zm00001d018408
Zm00001d018628
Zm00001d034994
Zm00001d043653
Zm00001d034359
Zm00001d017768
Zm00001d026237
Zm00001d035470
Zm00001d048135
Zm00001d031811
Zm00001d034420
Zm00001d009627
Zm00001d043573
Zm00001d017240
Zm00001d021831
Zm00001d039406
Zm00001d021669
Zm00001d044734
Zm00001d028687
Zm00001d002066
Zm00001d002086
Zm00001d048510
Zm00001d053865
Zm00001d039384
Zm00001d029246
Zm00001d007753
Zm00001d038918
Zm00001d047777
Zm00001d032536
Zm00001d027733
Zm00001d028012
Zm00001d045204
Zm00001d027486
Zm00001d038998
Zm00001d002119
Zm00001d045358
Zm00001d013451
Zm00001d012603
Zm00001d033090
Zm00001d025911
Zm00001d013100
Zm00001d028307
Zm00001d002549
Zm00001d017761
Zm00001d039312
Zm00001d012749
Zm00001d003212
Zm00001d002796
Zm00001d018331
Zm00001d034751
Zm00001d049365
Zm00001d003048
Zm00001d038340
Zm00001d013058
Zm00001d017457
Zm00001d005997
Zm00001d017206
Zm00001d022277
Zm00001d006614
Zm00001d028075
Zm00001d017903
Zm00001d053889
Zm00001d034278
Zm00001d019734
Zm00001d051634
Zm00001d042804
Zm00001d018844
Zm00001d010420
Zm00001d032531
Zm00001d031815
Zm00001d007896
Zm00001d027856
Zm00001d038779
Zm00001d006170
Zm00001d043469
Zm00001d034601
Zm00001d035119
Zm00001d017840
Zm00001d017992
Zm00001d027457
Zm00001d053835
Zm00001d017977
Zm00001d026026
Zm00001d047893
Zm00001d027436
Zm00001d034015
Zm00001d048259
Zm00001d053639
Zm00001d032102
Zm00001d028214
Zm00001d009694
Zm00001d046865
Zm00001d045283
Zm00001d012834
Zm00001d035616
Zm00001d043056
Zm00001d014490
Zm00001d038864
Zm00001d028199
Zm00001d039120
Zm00001d039327
Zm00001d003497
Zm00001d001831
Zm00001d037004
Zm00001d029869
Zm00001d047912
Zm00001d038532
Zm00001d032603
Zm00001d006619
Zm00001d022204
Zm00001d002814
Zm00001d001894
Zm00001d045339
Zm00001d002317
Zm00001d038843
Zm00001d038775
Zm00001d039053
Zm00001d042275
Zm00001d046226
Zm00001d039355
Zm00001d022167
Zm00001d041381
Zm00001d051056
Zm00001d030858
Zm00001d027732
Zm00001d015877
Zm00001d026271
Zm00001d018390
Zm00001d031659
Zm00001d002325
Zm00001d021948
Zm00001d038946
Zm00001d025165
Zm00001d003311
Zm00001d006604
Zm00001d006451
Zm00001d038862
Zm00001d031441
Zm00001d012069
Zm00001d029673
Zm00001d015397
Zm00001d026594
Zm00001d046961
Zm00001d013992
Zm00001d031728
Zm00001d004707
Zm00001d012909
Zm00001d033098
Zm00001d018704
Zm00001d013336
Zm00001d027723
Zm00001d043025
Zm00001d026377
Zm00001d002531
Zm00001d018399
Zm00001d017726
Zm00001d020921
Zm00001d028721
Zm00001d014789
Zm00001d014858
Zm00001d025323
Zm00001d024567
Zm00001d040066
Zm00001d012194
Zm00001d032475
Zm00001d022236
Zm00001d028182
Zm00001d047972
Zm00001d027434
Zm00001d044516
Zm00001d002440
Zm00001d030920
Zm00001d007446
Zm00001d043296
Zm00001d025761
Zm00001d048220
Zm00001d016921
Zm00001d006254
Zm00001d037811
Zm00001d017684
Zm00001d002829
Zm00001d007037
Zm00001d026240
Zm00001d033748
Zm00001d012015
Zm00001d049409
Zm00001d002454
Zm00001d010640
Zm00001d042801
Zm00001d036748
Zm00001d034944
Zm00001d026263
Zm00001d047018
Zm00001d013025
Zm00001d033292
Zm00001d017857
Zm00001d042781
Zm00001d013376
Zm00001d045386
Zm00001d052378
Zm00001d051846
Zm00001d013795
Zm00001d018359
Zm00001d026111
Zm00001d048294
Zm00001d013407
Zm00001d039155
Zm00001d034643
Zm00001d030900
Zm00001d034238
Zm00001d017984
Zm00001d009695
Zm00001d007154
Zm00001d043090
Zm00001d017885
Zm00001d008703
Zm00001d035455
Zm00001d034365
Zm00001d038147
Zm00001d011312
Zm00001d042608
Zm00001d022226
Zm00001d043474
Zm00001d052340
Zm00001d009497
Zm00001d043454
Zm00001d008178
Zm00001d016792
Zm00001d002069
Zm00001d021495
Zm00001d035925
Zm00001d043492
Zm00001d003099
Zm00001d022044
Zm00001d013415
Zm00001d028406
Zm00001d026036
Zm00001d002285
Zm00001d045361
Zm00001d034257
Zm00001d048671
Zm00001d001862
Zm00001d005998
Zm00001d038449
Zm00001d012204
Zm00001d046261
Zm00001d018206
Zm00001d026530
Zm00001d018498
Zm00001d026559
Zm00001d048307
Zm00001d051981
Zm00001d039510
Zm00001d013388
Zm00001d047574
Zm00001d043158
Zm00001d016228
Zm00001d027532
Zm00001d012254
Zm00001d008812
Zm00001d026298
Zm00001d046812
Zm00001d049099
Zm00001d027374
Zm00001d002272
Zm00001d034028
Zm00001d029075
Zm00001d012494
Zm00001d031796
Zm00001d002132
Zm00001d028140
Zm00001d047998
Zm00001d048085
Zm00001d006016
Zm00001d052122
Zm00001d005932
Zm00001d016950
Zm00001d001879
Zm00001d030988
Zm00001d042993
Zm00001d018032
Zm00001d022492
Zm00001d006676
Zm00001d021668
Zm00001d012277
Zm00001d016730
Zm00001d034723
Zm00001d028370
Zm00001d025752
Zm00001d012401
Zm00001d037783
Zm00001d003833
Zm00001d034189
Zm00001d007830
Zm00001d012296
Zm00001d005978
Zm00001d027548
Zm00001d045042
Zm00001d017241
Zm00001d002618
Zm00001d033957
Zm00001d031808
Zm00001d053705
Zm00001d012333
Zm00001d039407
Zm00001d047808
Zm00001d040292
Zm00001d016588
Zm00001d012591
Zm00001d022378
Zm00001d027411
Zm00001d053866
Zm00001d018400
Zm00001d038448
Zm00001d053762
Zm00001d021299
Zm00001d028686
Zm00001d051420
Zm00001d021739
Zm00001d002087
Zm00001d012748
Zm00001d039375
Zm00001d022371
Zm00001d042909
Zm00001d052189
Zm00001d043060
Zm00001d048683
Zm00001d012445
Zm00001d026084
Zm00001d007360
Zm00001d026597
Zm00001d033777
Zm00001d043338
Zm00001d043740
Zm00001d021301
Zm00001d031265
Zm00001d032897
Zm00001d038884
Zm00001d018452
Zm00001d026308
Zm00001d015889
Zm00001d027934
Zm00001d037192
Zm00001d047259
Zm00001d052163
Zm00001d042654
Zm00001d027709
Zm00001d017113
Zm00001d017649
Zm00001d024996
Zm00001d027447
Zm00001d033652
Zm00001d051951
Zm00001d042780
Zm00001d047235
Zm00001d039110
Zm00001d020827
Zm00001d053195
Zm00001d011969
Zm00001d034073
Zm00001d014507
Zm00001d015186
Zm00001d012456
Zm00001d040429
Zm00001d014462
Zm00001d000303
Zm00001d048286
Zm00001d031638
Zm00001d021732
Zm00001d020609
Zm00001d018060
Zm00001d047878
Zm00001d045298
Zm00001d031168
Zm00001d046667
Zm00001d033503
Zm00001d011924
Zm00001d006594
Zm00001d033901
Zm00001d002405
Zm00001d048908
Zm00001d032408
Zm00001d032608
Zm00001d036676
Zm00001d002541
Zm00001d029065
Zm00001d003034
Zm00001d051699
Zm00001d002956
Zm00001d038531
Zm00001d044104
Zm00001d012821
Zm00001d034112
Zm00001d047560
Zm00001d048691
Zm00001d033419
Zm00001d012384
Zm00001d047812
Zm00001d053834
Zm00001d017978
Zm00001d048136
Zm00001d027429
Zm00001d044037
Zm00001d040462
Zm00001d042725
Zm00001d001913
Zm00001d028613
Zm00001d042902
Zm00001d037810
Zm00001d025707
Zm00001d021881
Zm00001d003180
Zm00001d032668
Zm00001d026662
Zm00001d024371
Zm00001d045203
Zm00001d046488
Zm00001d048471
Zm00001d028752
Zm00001d043973
Zm00001d012962
Zm00001d033682
Zm00001d049074
Zm00001d025919
Zm00001d044378
Zm00001d012211
Zm00001d019563
Zm00001d011654
Zm00001d012604
Zm00001d033257
Zm00001d047981
Zm00001d025901
Zm00001d044533
Zm00001d018460
Zm00001d015298
Zm00001d033284
Zm00001d039858
Zm00001d021954
Zm00001d026367
Zm00001d052777
Zm00001d027477
Zm00001d028369
Zm00001d044190
Zm00001d038470
Zm00001d018133
Zm00001d047955
Zm00001d032532
Zm00001d012932
Zm00001d031449
Zm00001d044662
Zm00001d020100
Zm00001d002631
Zm00001d036767
Zm00001d016635
Zm00001d025278
Zm00001d020371
Zm00001d017742
Zm00001d052343
Zm00001d032606
Zm00001d040460
Zm00001d022385
Zm00001d027652
Zm00001d017852
Zm00001d048052
Zm00001d025859
Zm00001d042921
Zm00001d017781
Zm00001d018031
Zm00001d021850
Zm00001d046981
Zm00001d039040
Zm00001d038262
Zm00001d027685
Zm00001d043221
Zm00001d051804
Zm00001d018659
Zm00001d012647
Zm00001d042850
Zm00001d022126
Zm00001d007199
Zm00001d020834
Zm00001d043382
Zm00001d007153
Zm00001d008181
Zm00001d045370
Zm00001d038783
Zm00001d018356
Zm00001d044068
Zm00001d029804
Zm00001d033067
Zm00001d048345
[truncated: 632 more rows]
